# Supplementary material for: IL-4-producing ILC2s are required for the differentiation of TH2 cells following Heligmosomoides polygyrus infection
Source: PubMed Central journal article supplement (PMC5257265; doi:10.1038/mi.2016.4), 2016-02-17

# Supplementary Figure 1

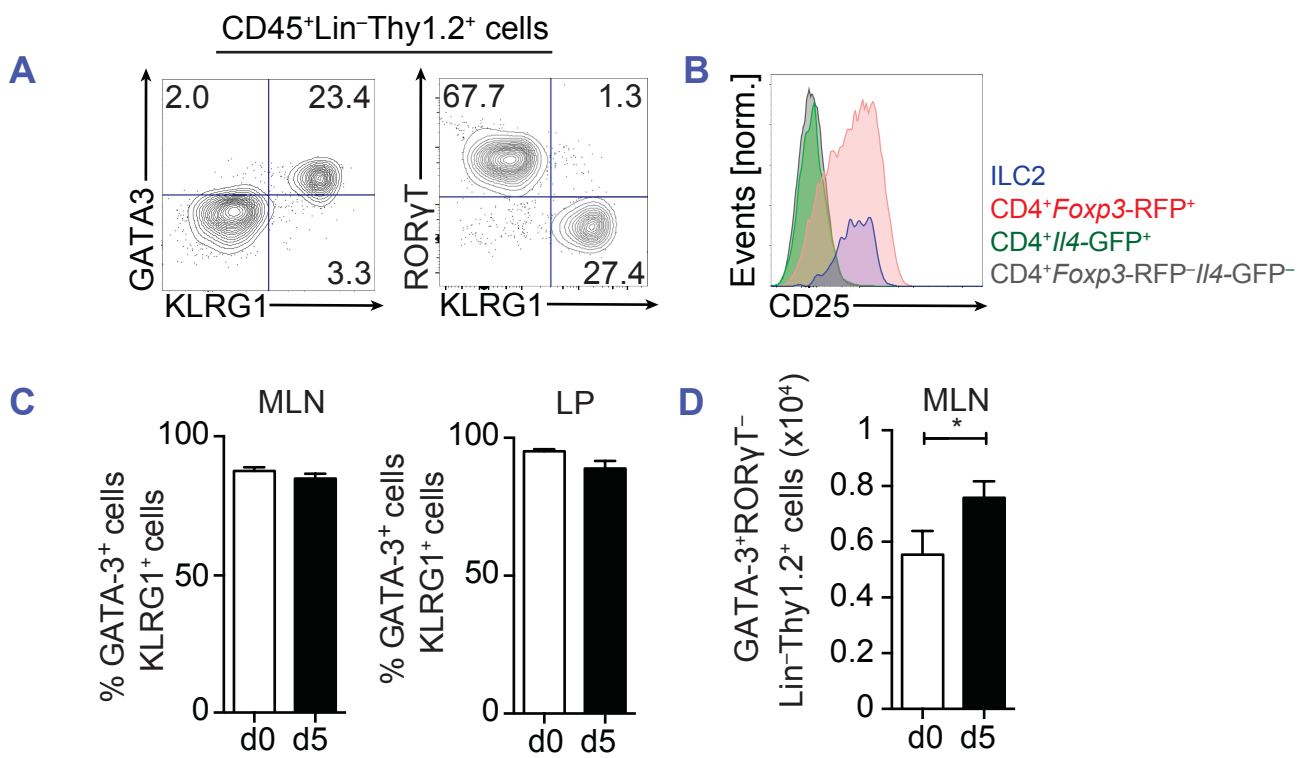

Supplementary Figure 2

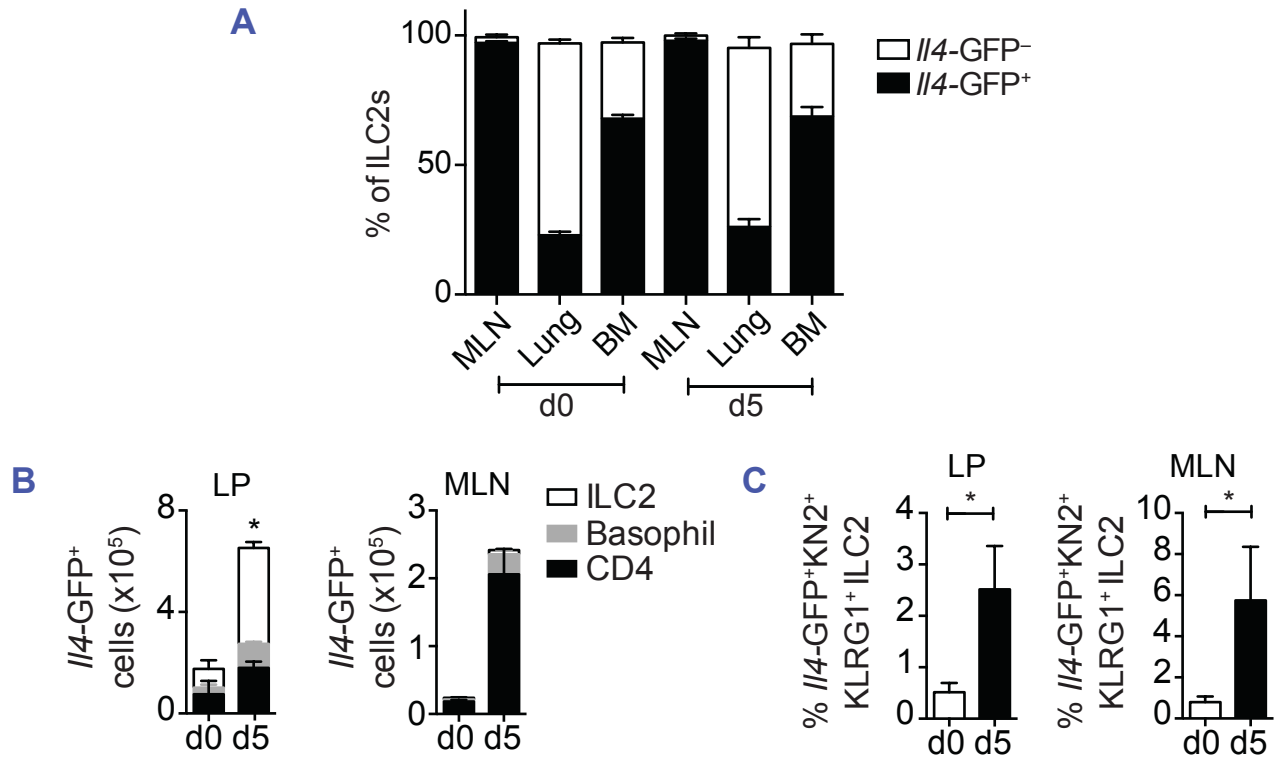

### Supplementary Figure 3

**A**

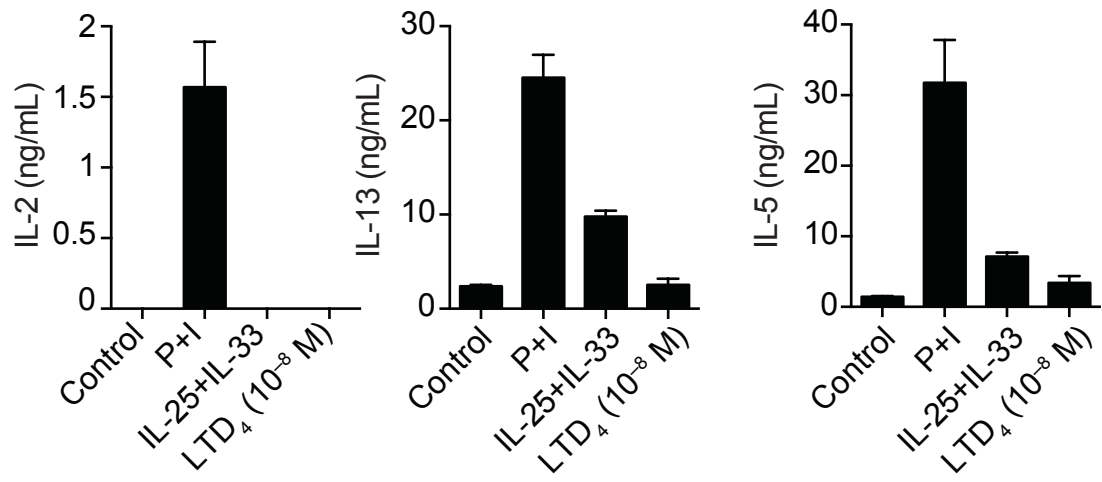

**B**

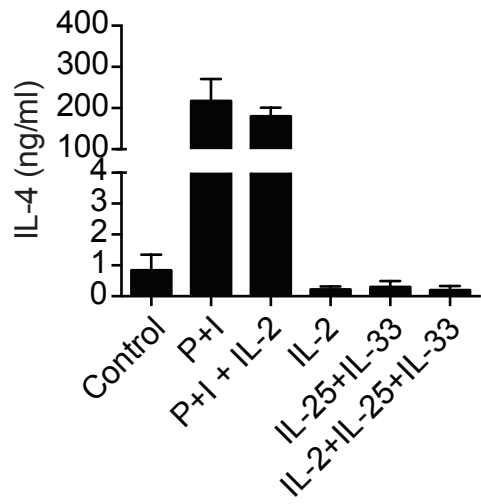

# Supplementary Figure 4

**A**

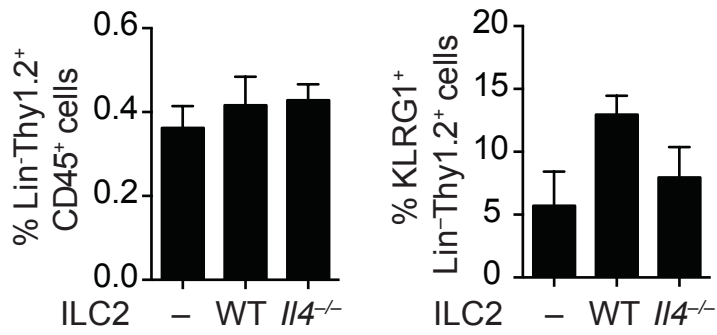

**B**

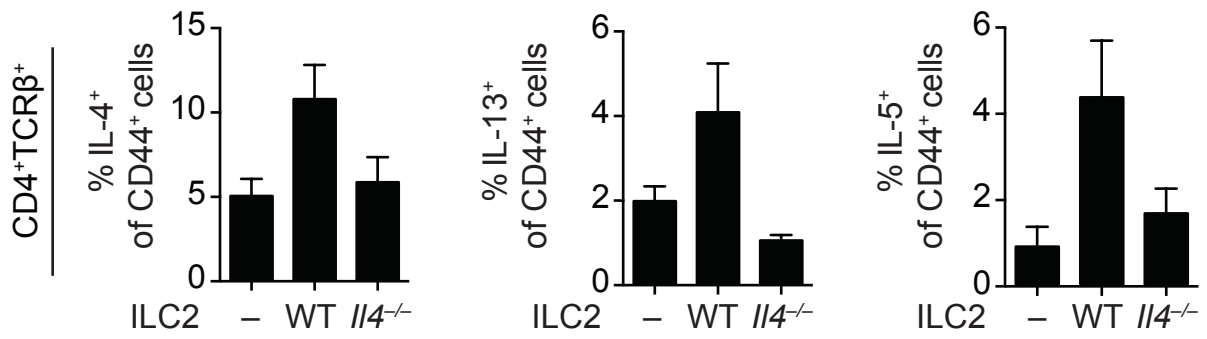

**C**

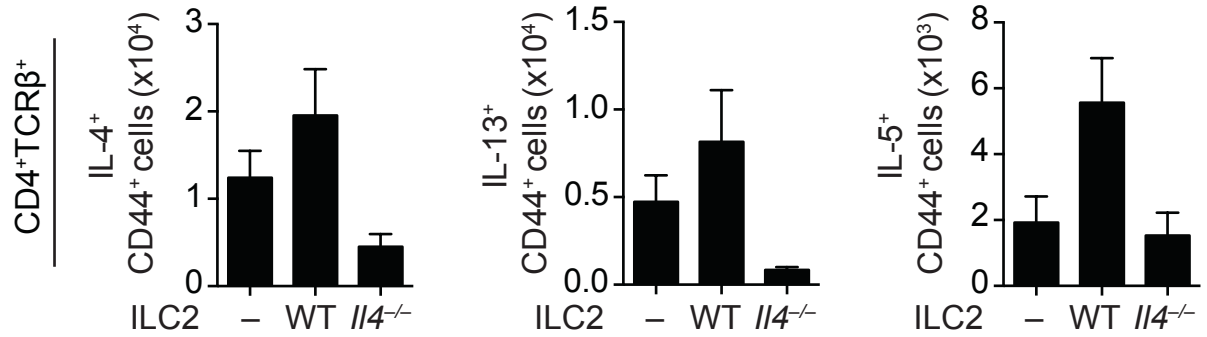

Supplement: NIHMS71055-supplement-Supp_Figs.pdf [file NIHMS71055-supplement-Supp_Figs.pdf]
